# Supplementary material for: Pyrolyzed cobalt hexacyanocobaltate dispersed on reduced-graphene-oxide as an electrocatalyst of the oxygen reduction reaction in an alkaline medium
Source: Royal Society of Chemistry journal article supplement (doi:10.1039/d2ta08682d), 2023-01-01
Supplement: d2ta08682d1.pdf [file d2ta08682d1.pdf]

## Supplementary Information

### **Pyrolyzed cobalt hexacyanocobaltate dispersed on reduced-graphene-oxide as an electrocatalyst of the oxygen reduction reaction in an alkaline medium**

B. Zakrzewska<sup>1</sup>, A. Jabłońska<sup>1</sup>, L. Adamczyk<sup>2</sup>, B. Dembińska<sup>1</sup>, A. Kostuch<sup>1</sup>, M. Strawski<sup>1</sup>, I.A. Rutkowska<sup>1</sup>, P.J. Kulesza<sup>1</sup>, M. Marcinek<sup>3</sup>, J.A. Cox<sup>4</sup>, K. Miecznikowski<sup>1\*</sup>

<sup>1</sup>University of Warsaw, Faculty of Chemistry, Pasteura 1, 02-093 Warsaw, Poland

<sup>2</sup>Czestochowa University of Technology, Faculty of Production Engineering and Materials Technology, Al. Armii Krajowej 19, 42-201 Czestochowa, Poland

<sup>3</sup>Warsaw University of Technology, Faculty of Chemistry, Noakowskiego 3, 00-664 Warsaw, Poland

<sup>4</sup>Department of Chemistry and Biochemistry, Miami University, Oxford, OH 45056, USA

\*Corresponding Author

E-mail address: [kmiecz@chem.uw.edu.pl](mailto:kmiecz@chem.uw.edu.pl)

Tel.: +48-22-5526340;

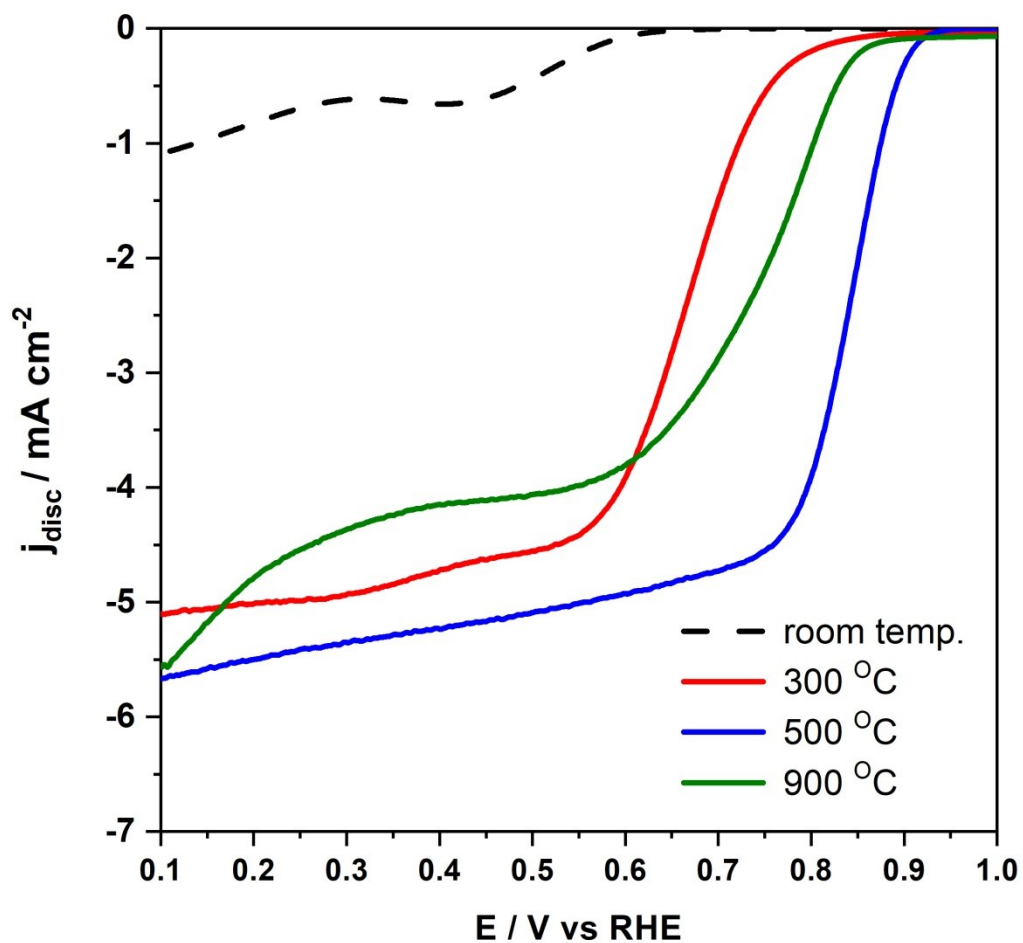

**Figure S1.** Current-potential RDE curves recorded in  $\text{O}_2$ -saturated  $0.1 \text{ mol dm}^{-3}$  KOH solution for materials derived by thermal treatment of CoHCNCo at various temperatures. Scan rate,  $10 \text{ mV s}^{-1}$ ; rotation rate: 1600 rpm.

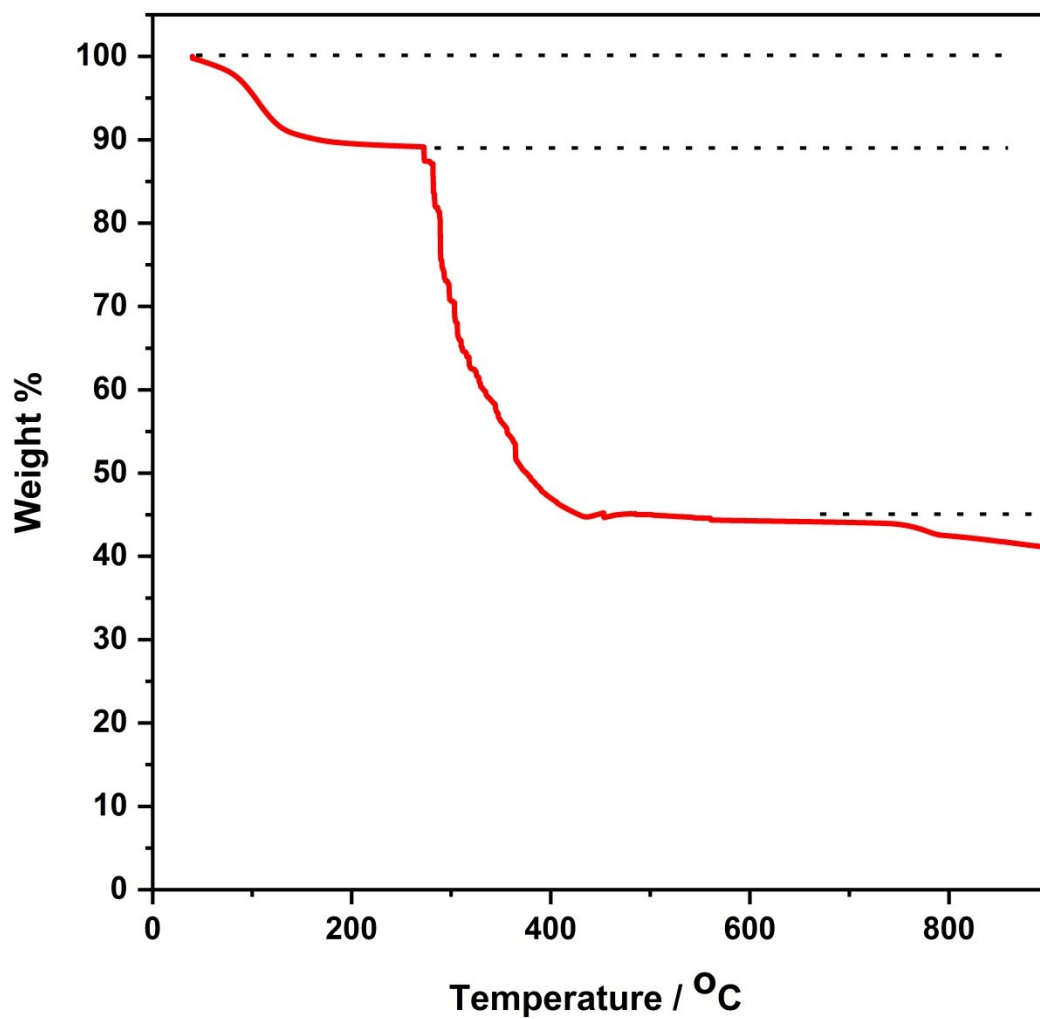

Figure S2. TGA profile of CoHCNCo.

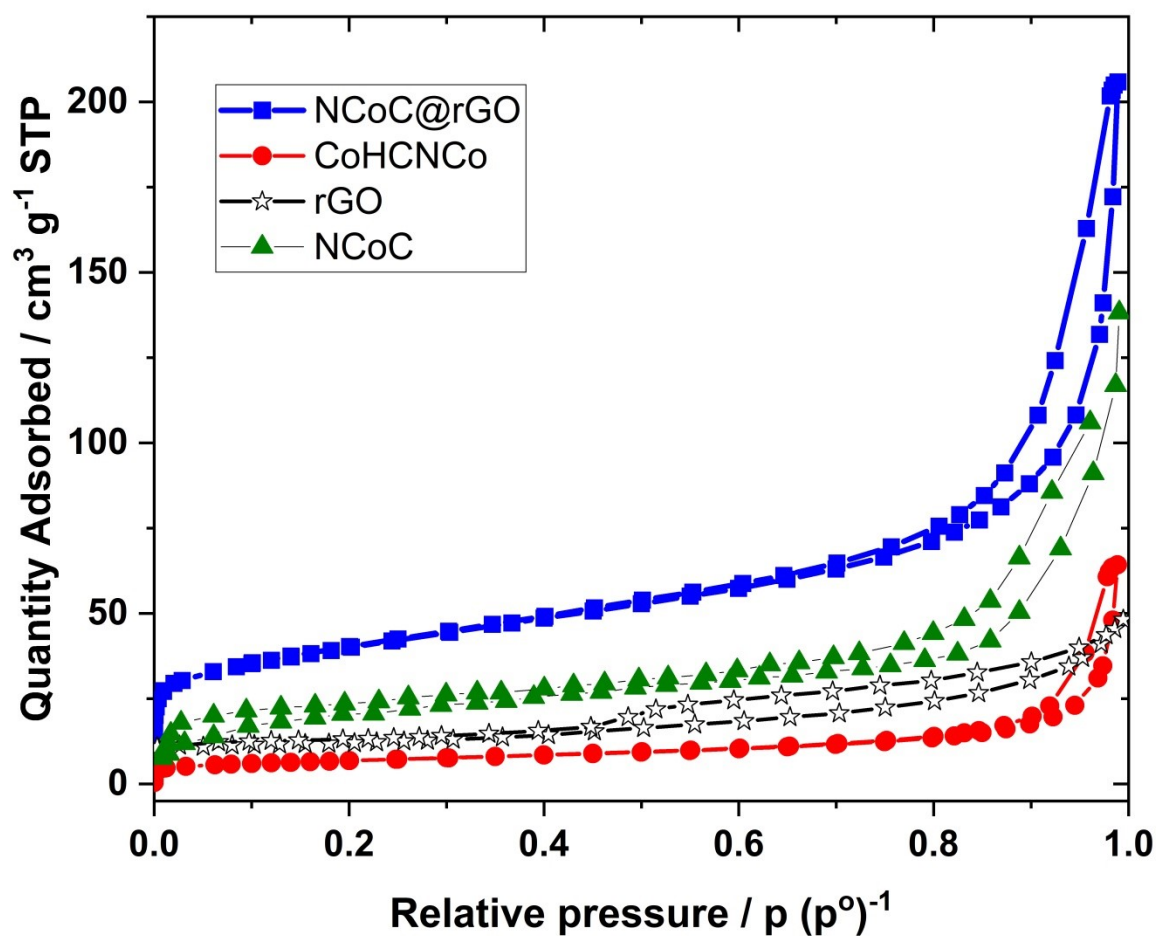

**Figure S3.** N<sub>2</sub> adsorption-desorption isotherms of CoHCNCo (red), rGO (black), NCoC thermally formed at 500 °C from CoHCNCo in the absence of rGO (green), and NCoC@rGO thermally formed at 500 °C from CoHCNCo@rGO (blue).

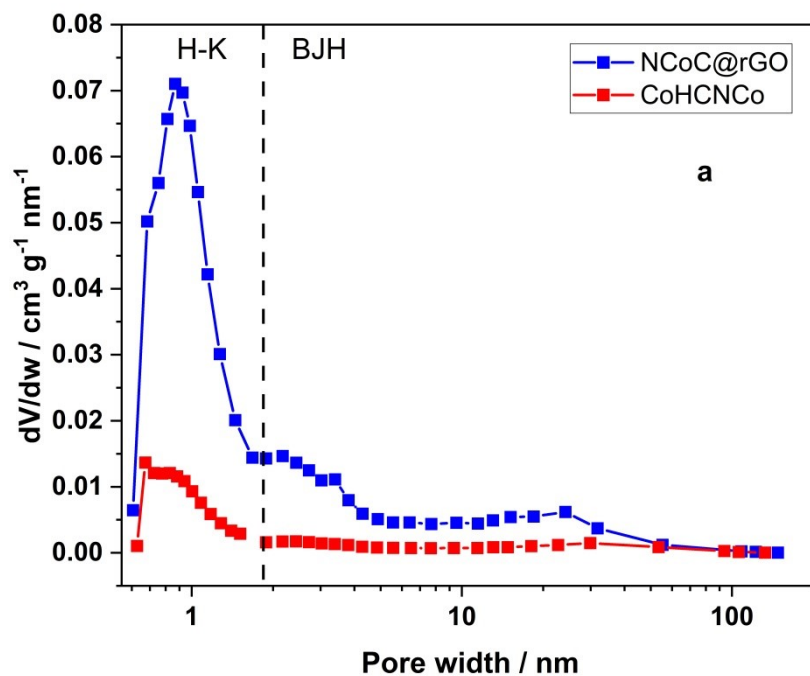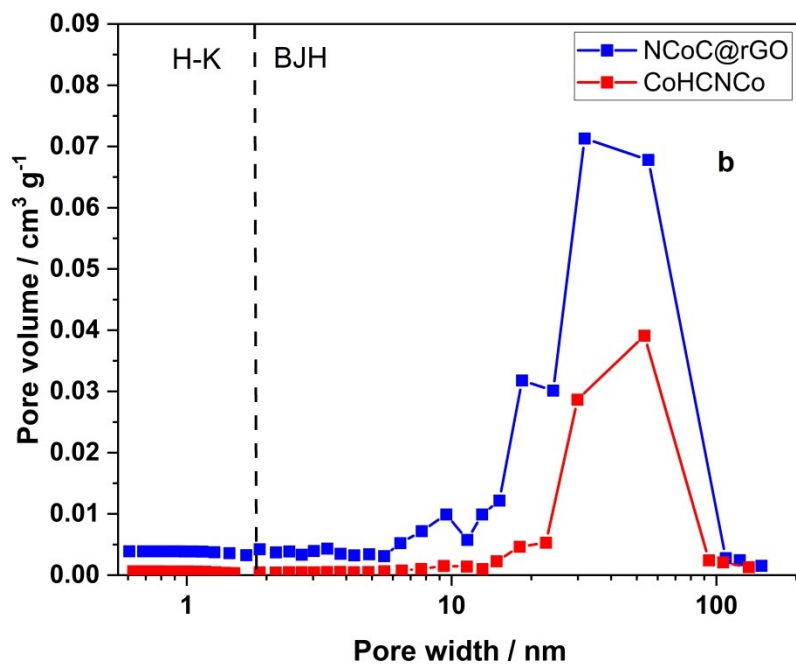

**Figure S4.** Pore size (a) and pore volumes (b) distributions for CoHCNCo (red curve) and NCoC@rGO formed by pyrolysis of CoHCNCo at 500 °C (blue curve).

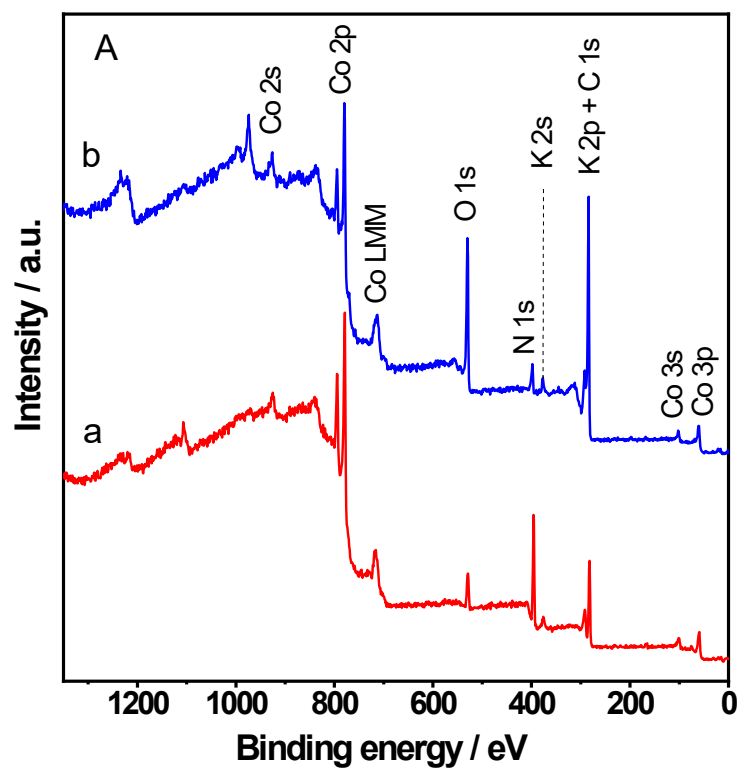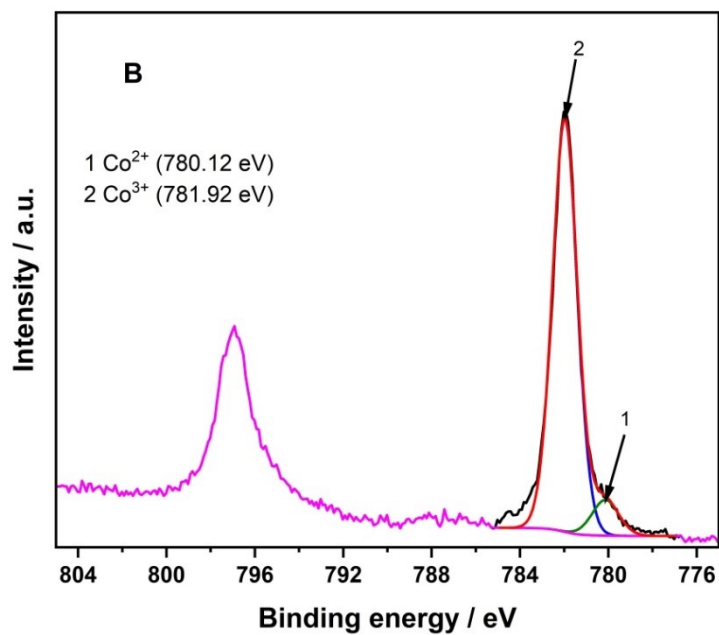

**Figure S5.** A) The overall XPS spectrum for CoHCNCo (red line) and NCoC@rGO (blue line). B) Co 2p spectral region of  $K_3[Co(CN)_6]$ .

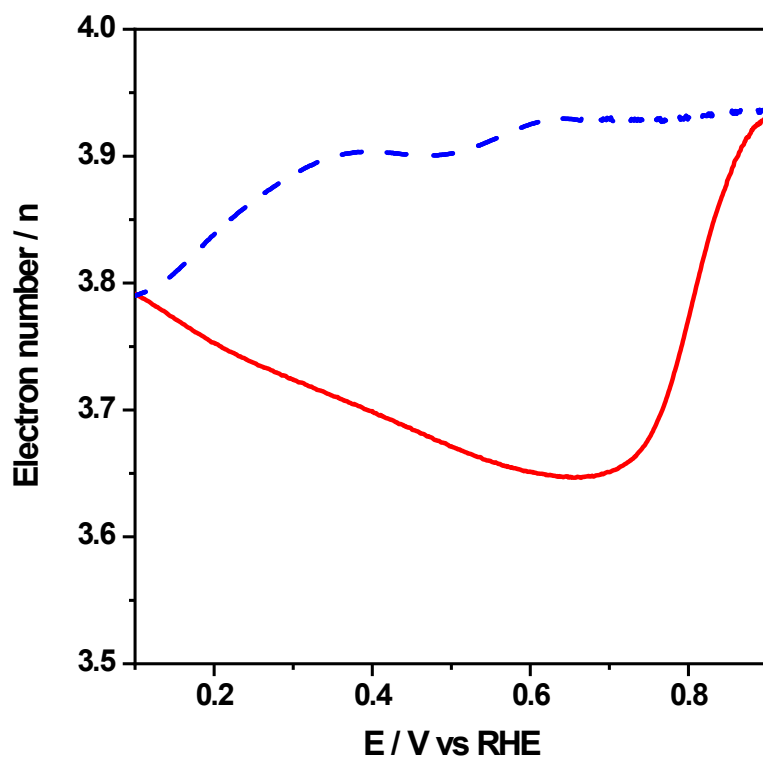

**Figure S6** Number of transferred electrons ( $n$ ) per oxygen molecule during the ORR at NCoC@rGO (solid line), and Pt/C nanoparticles (dashed line).

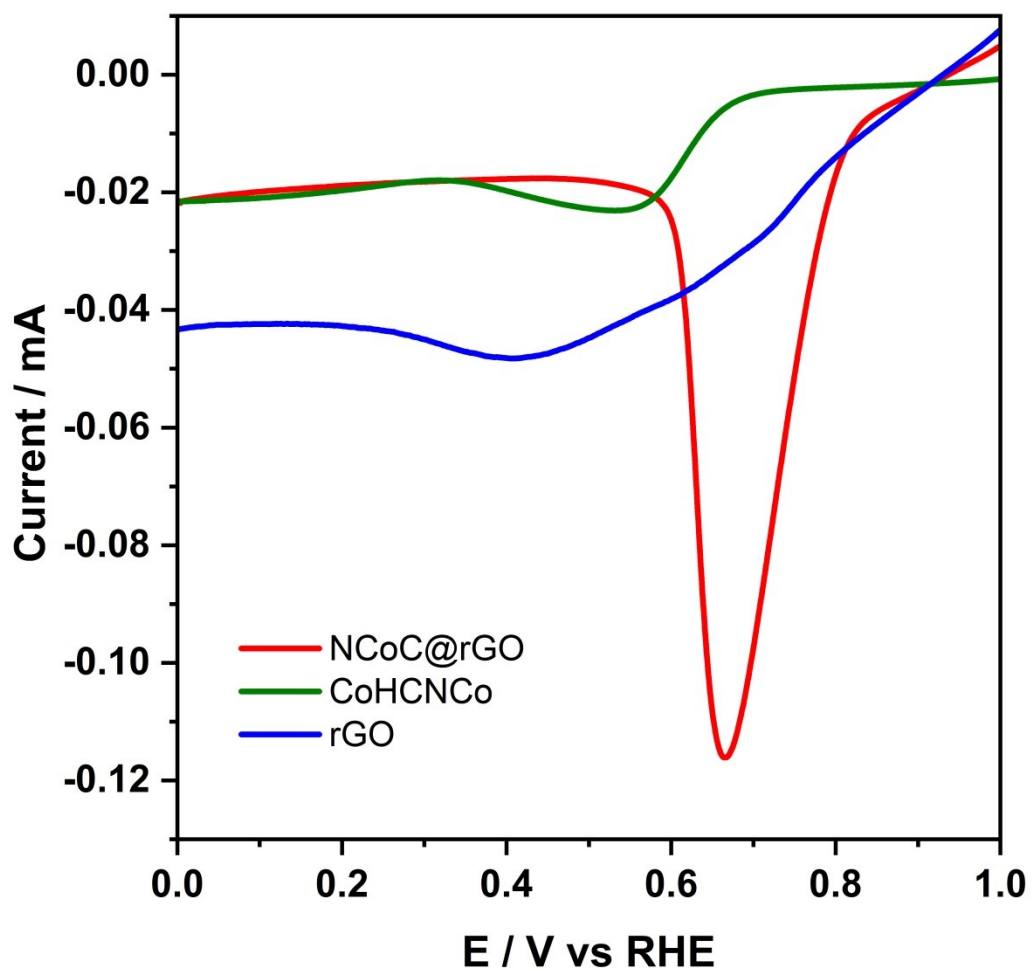

**Figure S7.** The LSV curves of rGO-, CoHCNCo- and NCoC@rGO-modified electrodes in  $2 \text{ mmol dm}^{-3} \text{ H}_2\text{O}_2$ ,  $0.1 \text{ mol dm}^{-3} \text{ KOH}$  solution. Scan rate,  $10 \text{ mV s}^{-1}$ .



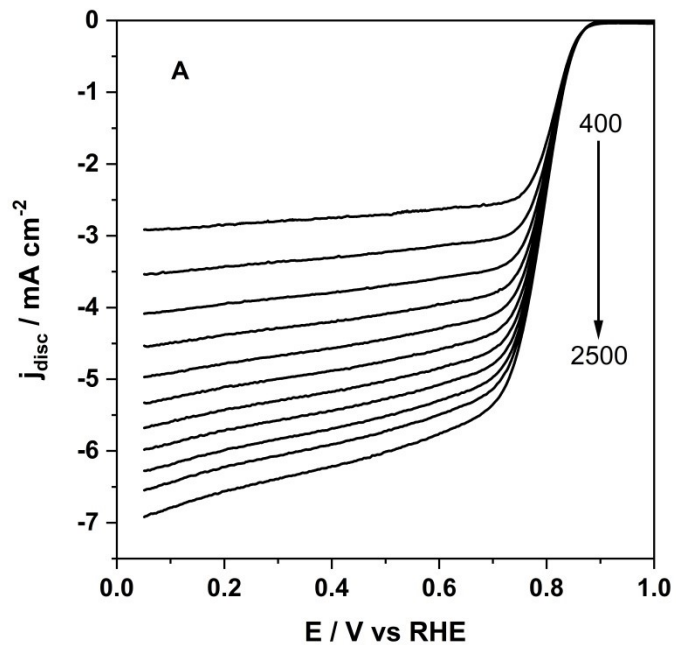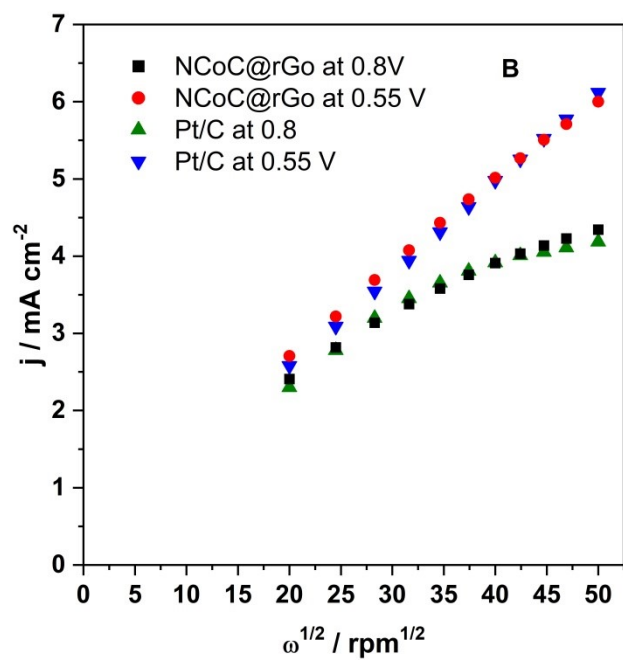

**Figure S8.** A) Linear scan voltammetry in  $\text{O}_2$ -saturated  $0.1 \text{ mol dm}^{-3}$  KOH at a NCoC@rGO-modified disk as a function of rotation rate in the range, 400 – 2500 rpm. Scan rate,  $10 \text{ mV s}^{-1}$ . B) Levich plots corresponding to Fig. S8A conditions for the ORR at NCoC@rGO and Pt/C.

**Table S1.** Comparison of the ORR performance for different catalysts.

| Catalyst    | Synthesis procedure                       | $E_{\text{onset}}$ (V vs RHE) | $E_{1/2}$ (V vs RHE) | Number of electrons | Ref.         |
|-------------|-------------------------------------------|-------------------------------|----------------------|---------------------|--------------|
| CoFe-NC/NC  | Pyrolysis of CoFePBA at 800 °C            | 0.96                          | 0,83                 | 3.94-3.99           | <sup>1</sup> |
| Co/C        | pyrolysis of ZIF-67 at 900 °C             | 0.85                          | 0.80                 | -                   | <sup>2</sup> |
| CdHCF       | -                                         | 0.84                          | -                    | 2.4                 | <sup>3</sup> |
| CoFe@NCS    | Pyrolysis of CoHCNFe with ZIF-8 at 750 °C | -                             | 0.83                 | 3.7                 | <sup>4</sup> |
| CuHCF/f-CNT | Hydrothermal synthesis at 120 °C          | 0.79                          | 0.63                 | 3.6-.8              | <sup>5</sup> |
| NCoC@rGO    | Pyrolysis of CoHCNCo/rGO                  | 0.92                          | 0.83                 | 3.7-3.8             | In this work |

## References

- 1 T. Najam, M. Wang, M. S. Javed, S. Ibraheem, Z. Song, M. M. Ahmed, A. ur Rehman, X. Cai and S. S. A. Shah, *Journal of Colloid and Interface Science*, 2020, **578**, 89–95.
- 2 X. Jin, Y. Xie, C. Zhao, Y. Xu, Y. Lv, H. Wang, L. Chen and J. Huang, *Progress in Natural Science: Materials International*, 2021, **31**, 527–535.
- 3 N. K. Shrestha, H. T. Bui, S. J. Yoon, S. A. Patil, C. Bathula, K. Lee, Y.-Y. Noh and S.-H. Han, *Journal of Electroanalytical Chemistry*, 2019, **847**, 113179.
- 4 H. Cheng, Y. Zhuang, C. Meng, B. Chen, J. Chen, A. Yuan and H. Zhou, *Applied Surface Science*, 2023, **607**, 154953.
- 5 P. Jain, S. Jha and P. P. Ingole, *Sustainable Energy Fuels*, 2022, **6**, 1094–1107.
